# Supplementary material
Source: Springer Nature journal article supplement (https://www.springerprofessional.de/resource/supplementary/13638_2011_303_MOESM2_ESM.pdf/11898162)

*LDPC Code Construction & Verification & Hardware Implementation Platform*

**generate  
candidate codes**

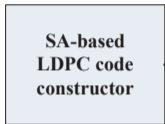

**select & pick  
codes**

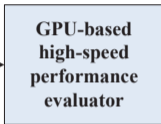

**optimize  
hardware efficiency**

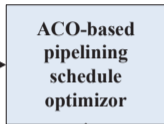

**hardware implementation**

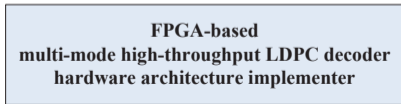

**good LDPC  
codes**

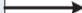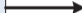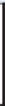

Supplement: MOESM2 [file 11898162]
